# Supplementary material for: HP1 cooperates with CAF-1 to compact heterochromatic transgene repeats in mammalian cells
Source: PubMed Central journal article supplement (PMC6147918; doi:10.1038/s41598-018-32381-7), 2018-09-20
Supplement: 41598_2018_32381_MOESM1_ESM.pdf [file 41598_2018_32381_MOESM1_ESM.pdf]

## **Supplemental Information**

### **HP1 cooperates with CAF-1 to compact heterochromatic transgene repeats in mammalian cells**

Haiyan Yan<sup>1,2,\*</sup>, Xingfeng Xiang<sup>1,2</sup>, Qinfu Chen<sup>1</sup>, Xuan Pan<sup>1</sup>, Hankun Cheng<sup>1</sup>, Fangwei Wang<sup>1,\*</sup>

**Supplementary Figure S1.** The original full-length blots related to Figure 2c.

Lane 1: Mock

Lane 2: VP16+ $\Delta$ HP1

Lane 3: VP16+HP1 $\alpha$ WT

Lane 4: VP16+HP1 $\alpha$ I165E

Lane 5: VP16+HP1 $\alpha$ W174A

1      2      3                      4      5

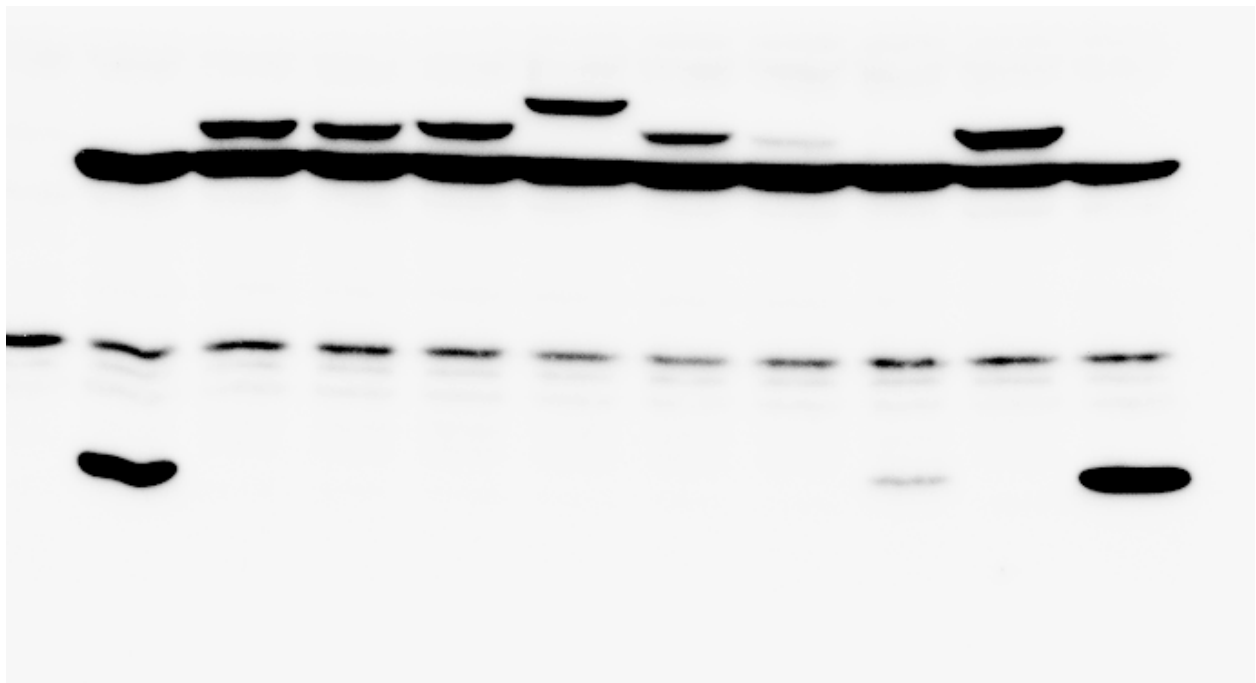

**Supplementary Table S1.** Schematics of plasmid constructs.

|                                     |                |                                      |
|-------------------------------------|----------------|--------------------------------------|
| phTet-On-Flag                       | hrTetR         | Flag                                 |
| pTet-On-TR                          | rTetR          | TR $\beta$                           |
| phTet-On-VP16                       | hrTetR         | VP16                                 |
| phTet-On-Flag-NLS-VP16              | hrTetR         | Flag NLS VP16                        |
| phTet-On-Flag-NLS- $\Delta$ HP1     | hrTetR         | Flag NLS                             |
| phTet-On-Flag-HP1 $\alpha$          | hrTetR         | Flag HP1                             |
| phTet-On-Flag-p150                  | hrTetR         | Flag p150                            |
| pEYFP-LacR                          | EYFP           | LacR                                 |
| pEYFP-LacR-VP16                     | EYFP           | LacR VP16                            |
| pEYFP-LacR-p150                     | EYFP           | LacR p150                            |
| pECFP-p150                          | ECFP           | p150                                 |
| pECFP-p60                           | ECFP           | p60                                  |
| pECFP-p48                           | ECFP           | p48                                  |
| pSV2-p150                           | pSV2           | p150                                 |
| p16TRE-CMV <sub>m</sub> -Luciferase | 16xTRE repeats | Pcmv <sub>m</sub> Firefly luciferase |
